# Supplementary material for: A 70% Ethanol Neorhodomela munita Extract Attenuates RANKL-Induced Osteoclast Activation and H2O2-Induced Osteoblast Apoptosis In Vitro
Source: MDPI journal article supplement (doi:10.3390/molecules29081741), 2024-04-11

# A 70% ethanol *Neorhodomela munita* extracts attenuates RANKL-induced osteoclast activation and H<sub>2</sub>O<sub>2</sub>-induced osteoblast apoptosis in vitro

Seongtae Jeong<sup>1,#</sup>, Il-Kwon Kim<sup>2,#</sup>, Hanbyeol Moon<sup>3</sup>, Hojin Kim<sup>4</sup>, Byeong-Wook Song<sup>5</sup>, Jung-Won Choi<sup>6</sup>, Sang Woo Kim<sup>5</sup>, Seahyoung Lee<sup>5</sup>, Dong-Sik Chae<sup>7,\*</sup>, Soyeon Lim<sup>5,\*</sup>

## Supplementary Figures

**Figure S1.** LC/MS chromatograms of a 70% ethanol *Neorhodomela munita* extract (EN)

**Blank**

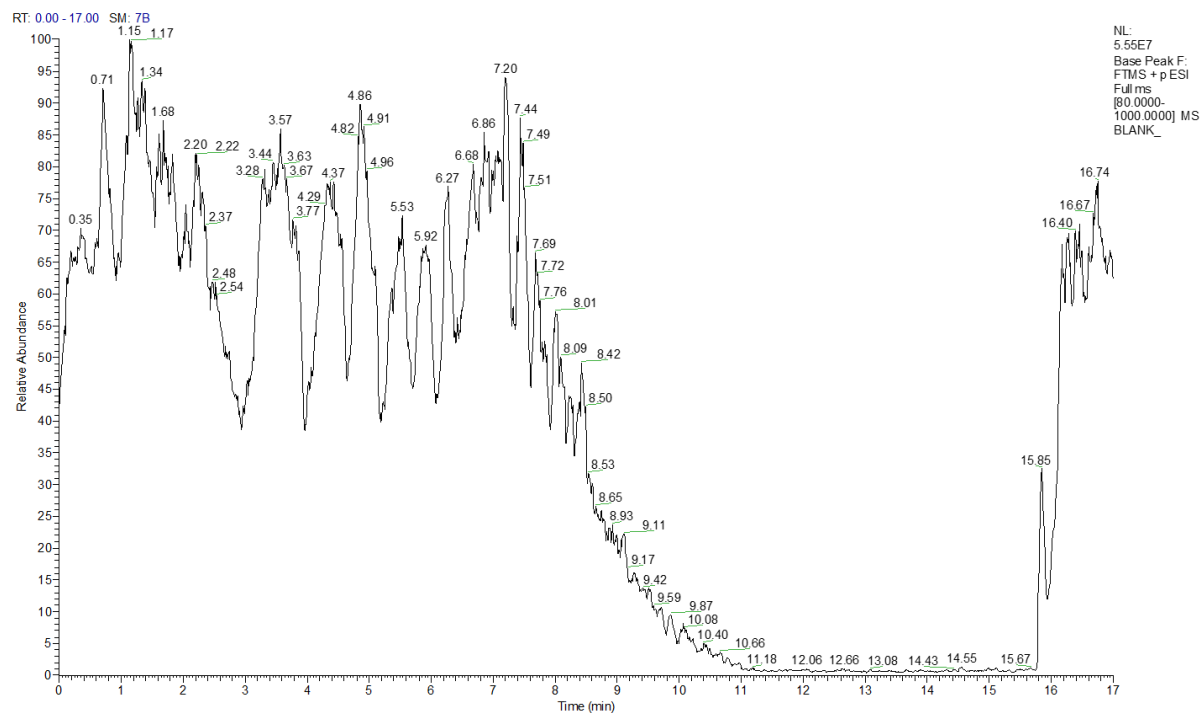

**EN**

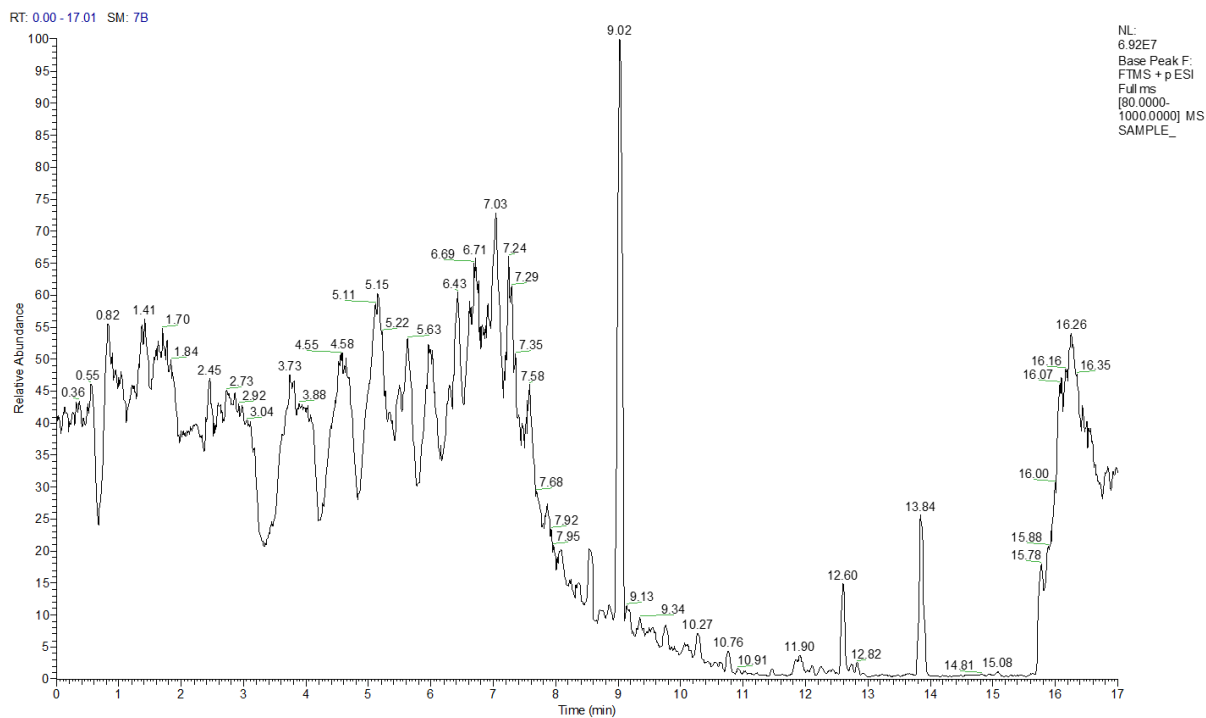

**Figure S2.** LC/MS analysis of a 70% ethanol *Neorhodomela munita* extract (EN)

No. 1. 6-Aminocaproic acid

**SAMPLE\_(F2)#377, RT=0.789 min, MS1, FTMS(+)**  
**C6 H13 N O2 as [M+H]<sup>+</sup>1**

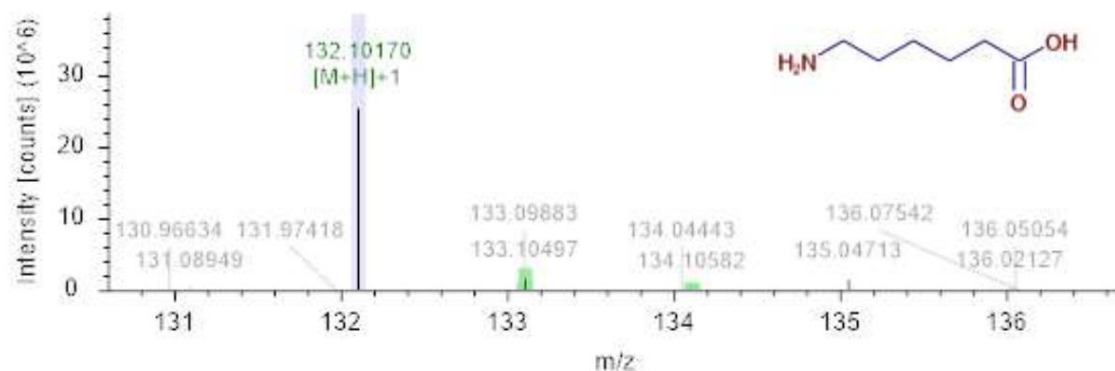

No. 2. 1-carboxy-3-hydroxyadamantane

**SAMPLE\_(F2)#3373, RT=7.263 min, MS1, FTMS(+)**  
**C11 H16 O3 as [M+H]<sup>+</sup>1**

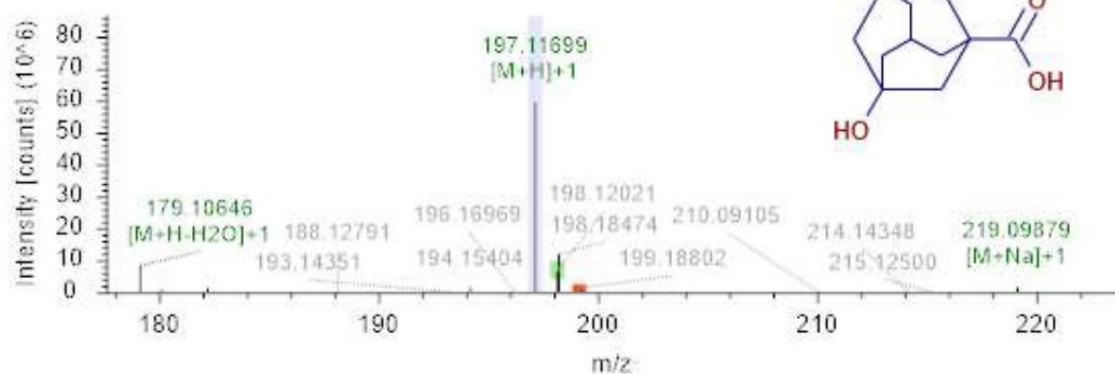

No. 3. Choline

**SAMPLE\_(F2)#335, RT=0.705 min, MS1, FTMS(+)**  
**C5 H13 N O as [M+H]<sup>+</sup>1**

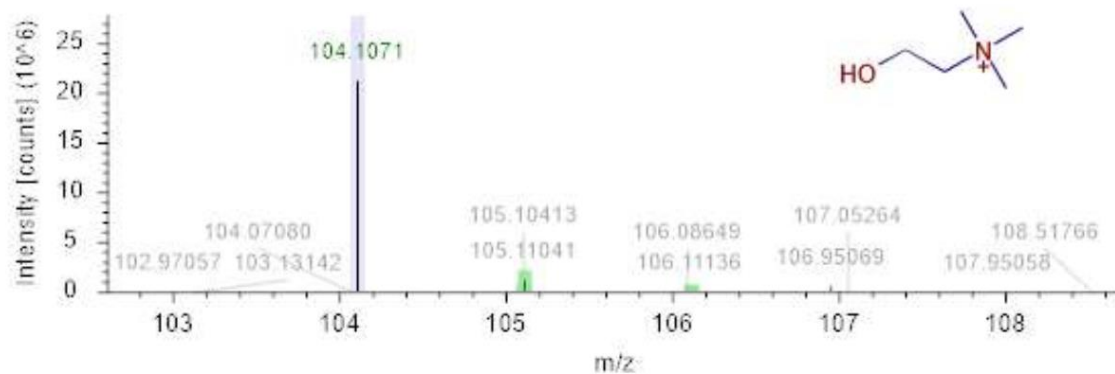

No. 4. Hexamethylcyclotrisiloxane

**SAMPLE\_(F2)#3012, RT=6.527 min, MS1, FTMS(+)**  
**C6 H18 O3 Si3 as [M+H]<sup>+</sup>1**

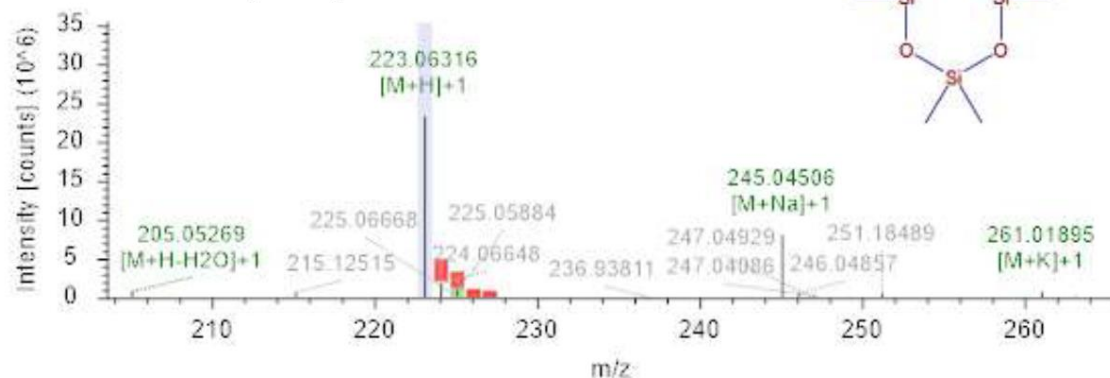

No. 5. 1-carboxy-3-hydroxyadamantane

**SAMPLE\_(F2)#3457, RT=7.435 min, MS1, FTMS(+)**  
**C11 H16 O3 as [M+H]<sup>+</sup>1**

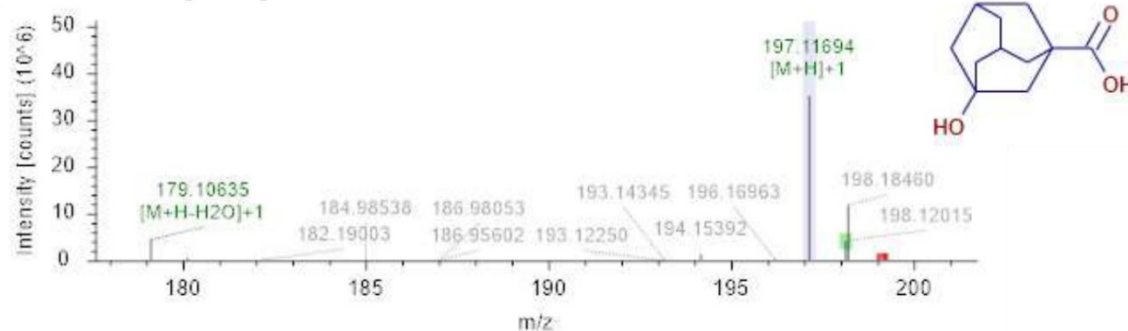

No. 6. Betaine

**SAMPLE\_(F2)#389, RT=0.812 min, MS1, FTMS(+)**  
**C5 H11 N O2 as [M+H]<sup>+</sup>1**

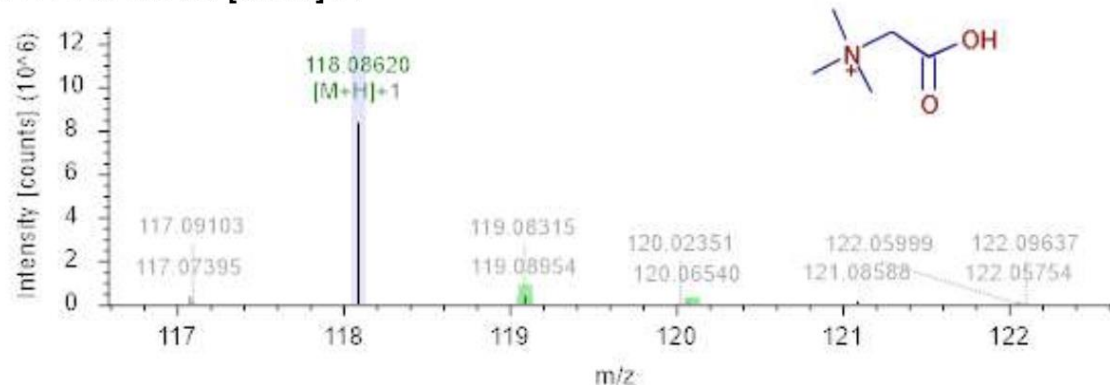

No. 7. Amino(5-bromo-2,4-dimethoxyphenyl)acetic acid

**SAMPLE\_(F2)#3048, RT=6.601 min, MS1, FTMS(+)**  
**C10 H12 Br N O4 as [M+H]<sup>+</sup>1**

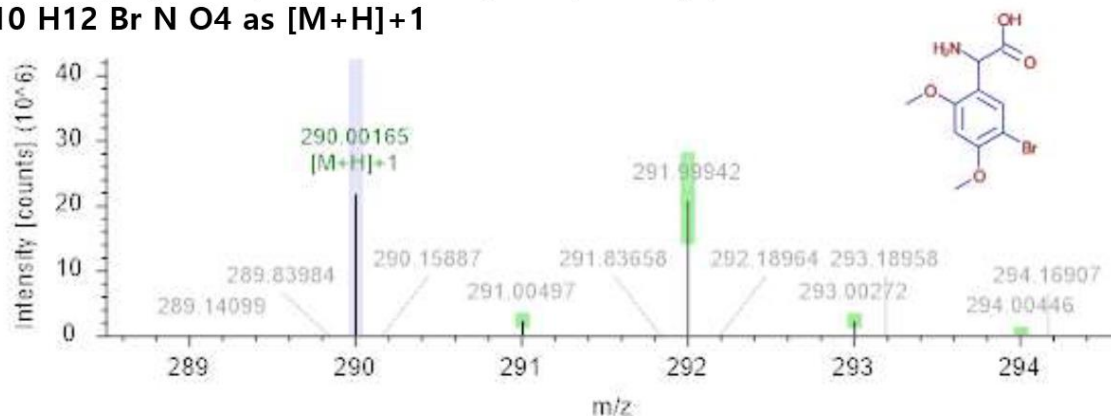

No. 8. D-(+)-Proline

**SAMPLE\_(F2)#377, RT=0.789 min, MS1, FTMS(+)**  
**C5 H9 N O2 as [M+H]<sup>+</sup>1**

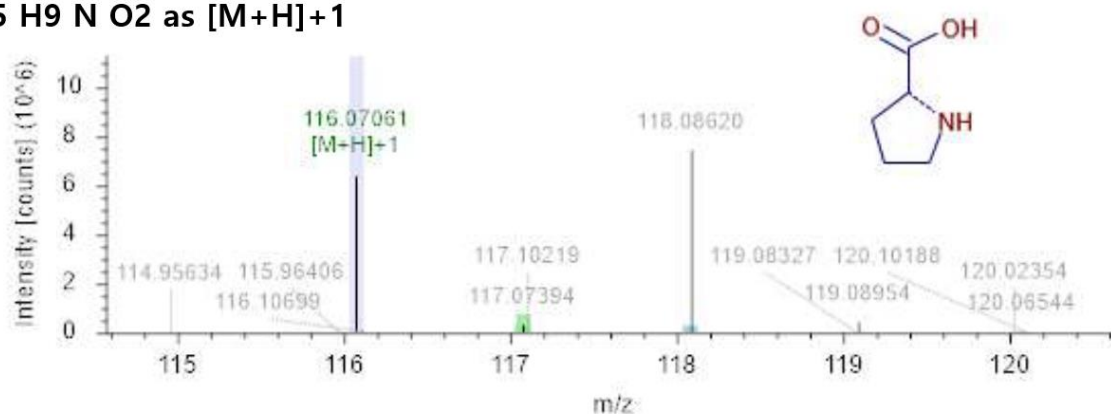

No. 9. 2-tert-Butyl-4-methoxyphenol

**SAMPLE\_(F2)#3964, RT=8.548 min, MS1, FTMS(+)**  
**C11 H16 O2 as [M+H]<sup>+</sup>1**

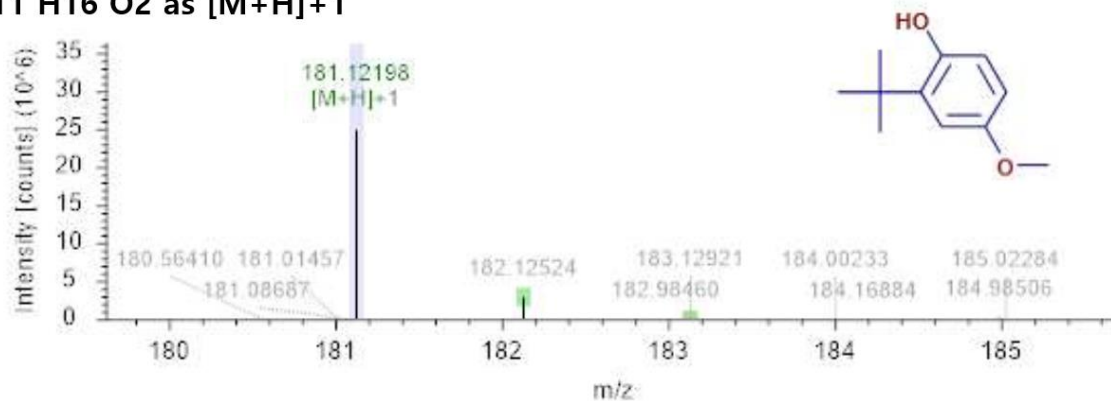

No. 10. Nicotinamide

**SAMPLE\_(F2)#605, RT=1.251 min, MS1, FTMS(+)**  
**C6 H6 N2 O as [M+H]<sup>+</sup>1**

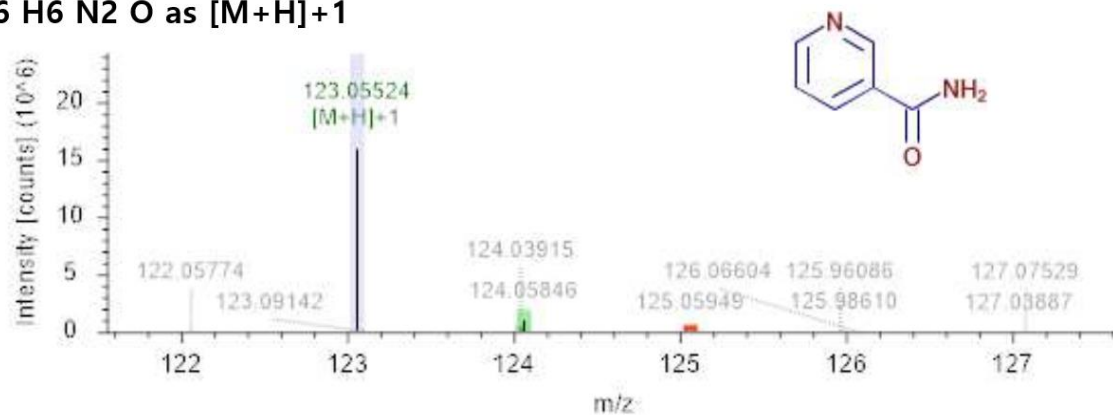

**Table S1.** LC/MS profile of 4 compounds with  $\geq 90\%$  match to the mzCloud spectral library

| Area (Max.)  | ChemSpider Results | mzCloud Match (%) | Best Match (%) | mzCloud Match (%) | Name                    |
|--------------|--------------------|-------------------|----------------|-------------------|-------------------------|
| 62495868.421 | 116                | 99.6              | 70.2           |                   | Nicotinamide            |
| 59229768.358 | 32                 | 95.8              | 98.3           |                   | Erucamide               |
| 18905808.584 | 52                 | 96                | 98.4           |                   | 4-Guanidinobutyric acid |
| 3714558.609  | 87                 | 93.7              | 95.3           |                   | Monolein                |

| No. | Formula                                                      | Candidate<br>M.W. | RT[min] |
|-----|--------------------------------------------------------------|-------------------|---------|
| 1   | C <sub>6</sub> H <sub>6</sub> N <sub>2</sub> O               | 122.048           | 1.25    |
| 2   | C <sub>22</sub> H <sub>43</sub> NO                           | 337.3337          | 12.599  |
| 3   | C <sub>5</sub> H <sub>11</sub> N <sub>3</sub> O <sub>2</sub> | 145.0848          | 1.18    |
| 4   | C <sub>21</sub> H <sub>40</sub> O <sub>4</sub>               | 356.2922          | 10.778  |

**Figure S3.** Four candidate compounds were further screened on their anti-osteoclastic effect *in vitro*. (Left) TRAP staining shown in dark purple was observed at 40x magnification under a light microscope (Scale bar. 500  $\mu$ m). (Right) Counts of multinuclear cells ( $\geq 3$  nuclei) of TRAP-positive cells and larger multinuclear cells ( $\geq 10$  nuclei) of TRAP-positive cells are presented as percentages. Data are shown as mean  $\pm$  SEM ( $n \geq 3$ ). One-way analysis of variance (ANOVA) was utilized, followed by Bonferroni post hoc test for pairwise comparisons. \* $p < 0.05$ ; \*\* $p < 0.01$ ; \*\*\* $p < 0.001$ ; n.s. = not significant.

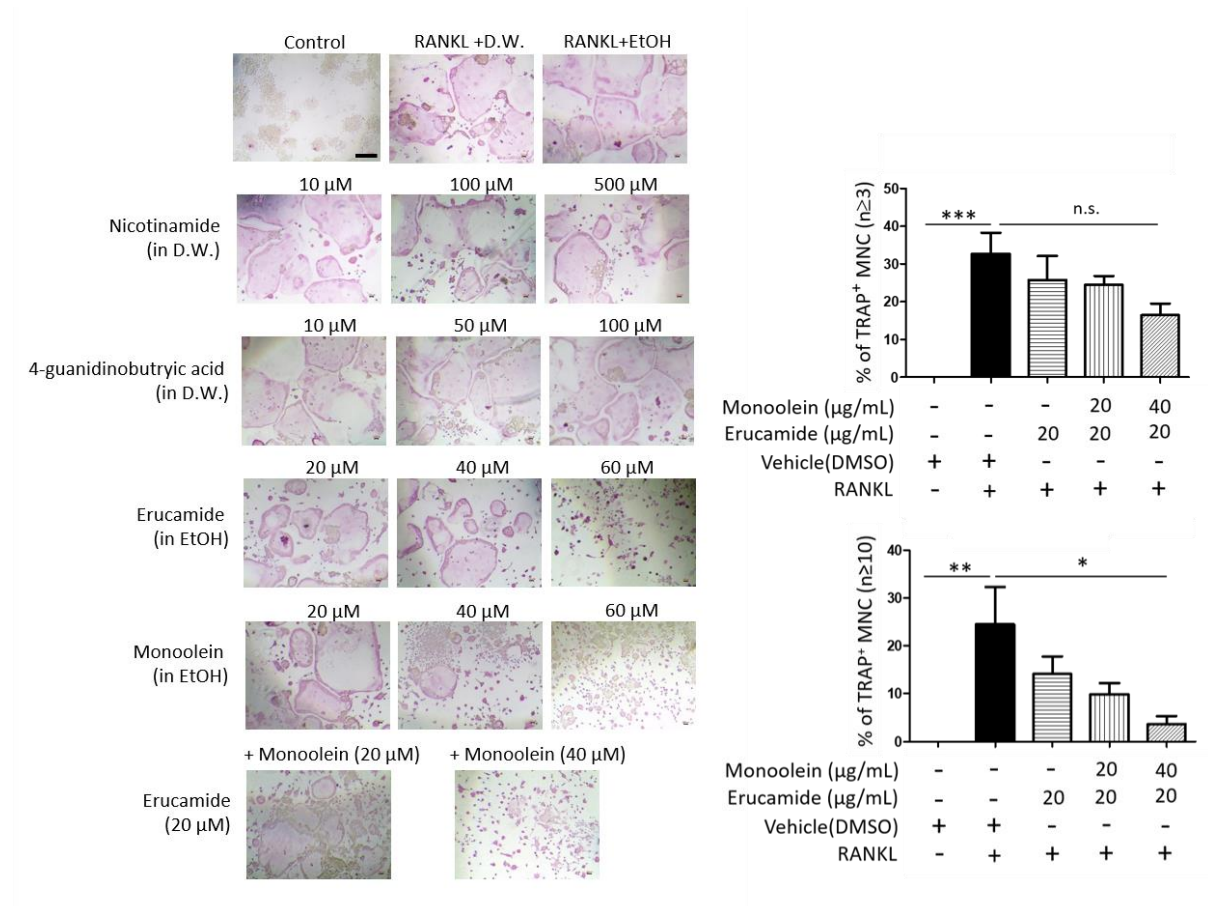

Supplement: s1 [file s1]
